# Supplementary material
Source: PubMed Central journal article supplement (PMC6168419)

**Supplementary Figure S1.** LLM treatment inhibited viability and AR expression in Myc-CaP cells. **(A)** Effect of LLM treatment of viability of Myc-CaP cells as determined by trypan blue dye exclusion assay. Combined results from two independent experiments are shown as mean  $\pm$  SD ( $n = 6$ ). \*Significantly different ( $p < 0.05$ ) compared with control by one-way ANOVA followed by Dunnett's test. **(B)** Immunoblotting for AR and phospho-AR (Ser213/210) proteins using lysates from Myc-CaP cells treated with ethanol or LLM. The blots were stripped and re-probed with  $\beta$ -Actin antibody for normalization. The number above the band indicates change in protein level compared with solvent control. The photographs are representative of three independent experiments. **(C)** Densitometric quantitation of AR and phospho-AR (Ser213/210) protein expression from 3 independent experiments. \*Significantly different ( $p < 0.05$ ) compared with control by one-way ANOVA followed by Dunnett's test.

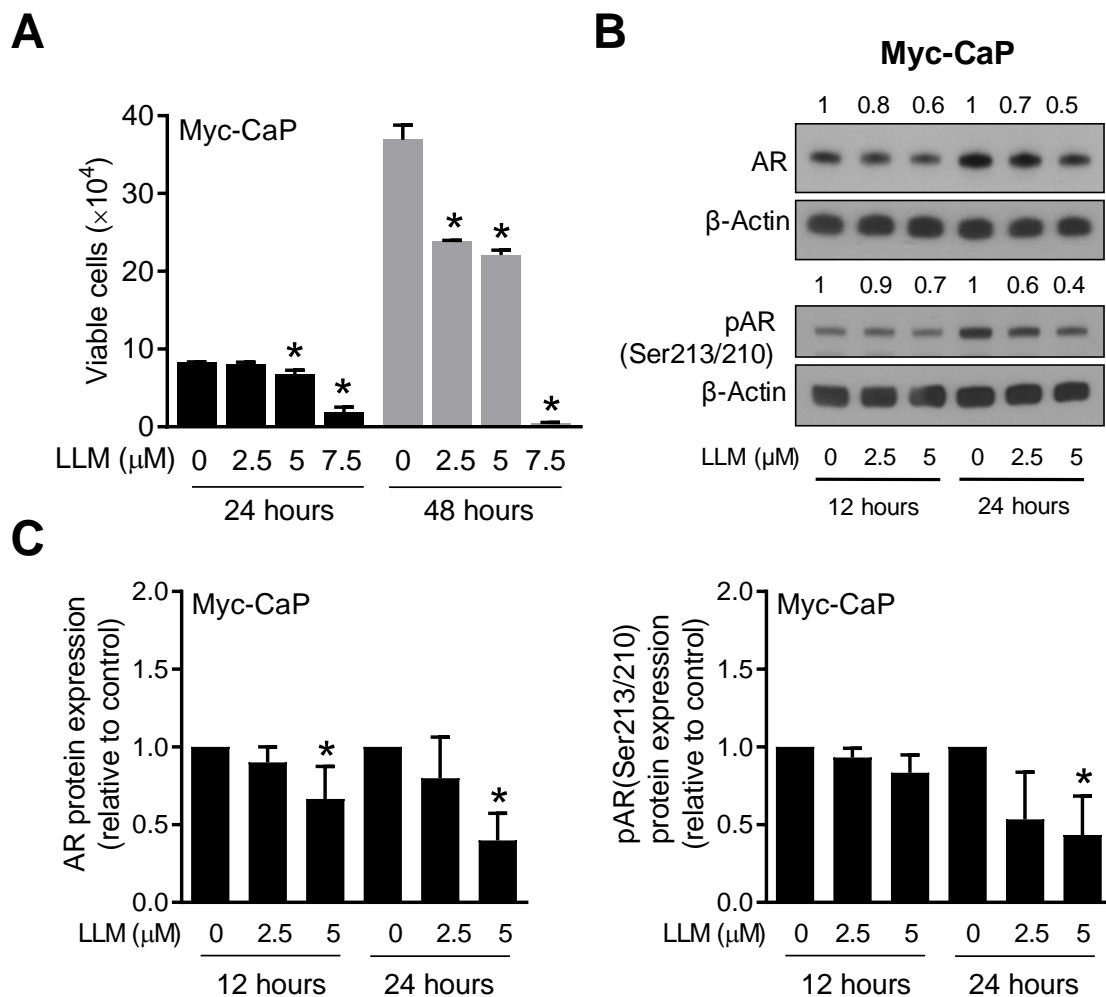

**Supplementary Figure S2.** Effect of LLM and/or R1881 treatments on proliferation of LNCaP and C4-2B cells. The cells were treated for 24, 48 or 72 hours. Experiment was repeated twice in triplicate and representative data from one such experiment is shown (mean  $\pm$  SD; n = 3).

\*Significantly different ( $p < 0.05$ ) compared with control; and #Significantly different ( $p < 0.05$ ) between LLM treatment group and R1881 group by one-way ANOVA followed by Bonferroni's multiple comparison test.

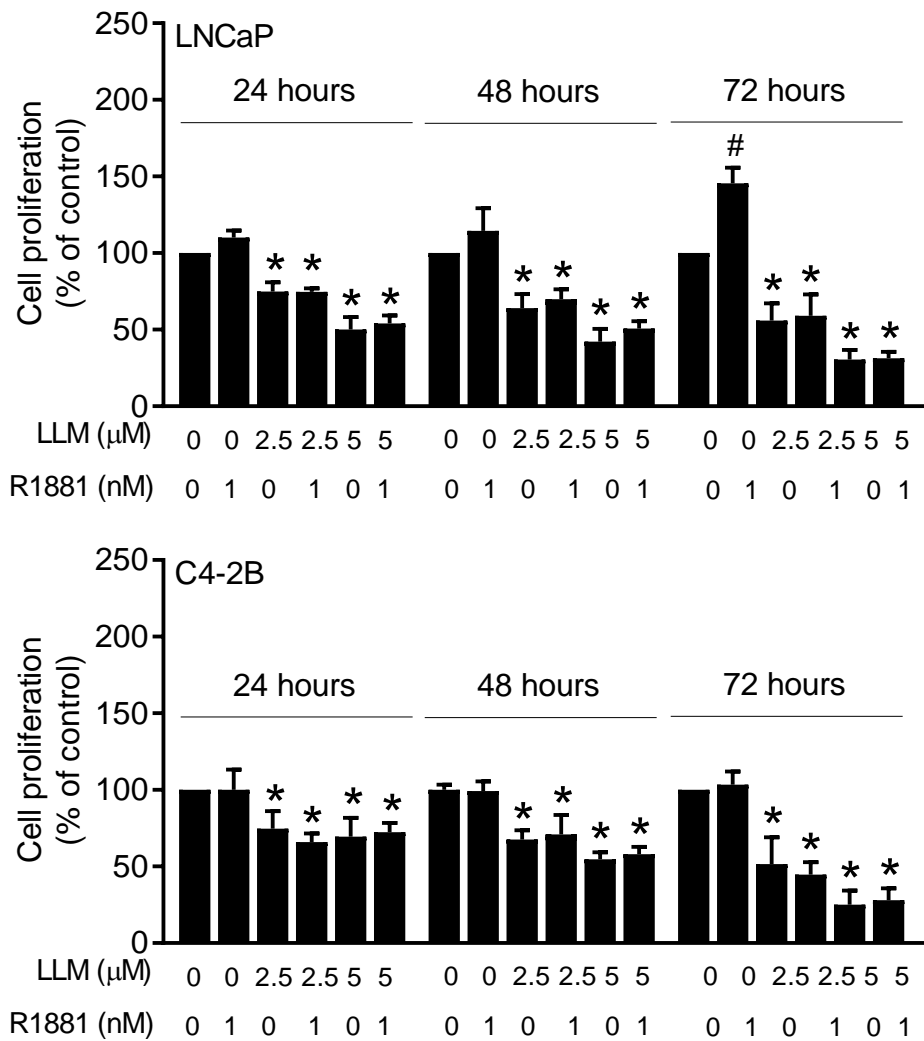

**Supplementary Figure S3.** LLM treatment downregulated AR protein expression in prostate cancer cells. Densitometric quantitation of immunoblots for AR, AR splice variants, AR-V7, and phospho-AR (Ser213/210) in 22Rv1, LNCaP, and C4-2B cells (for data shown in Fig. 2A of the main text). Results shown are mean  $\pm$  SD (n = 3 independent experiments). \*Significantly different ( $p < 0.05$ ) compared with control by one-way ANOVA followed by Dunnett's test.

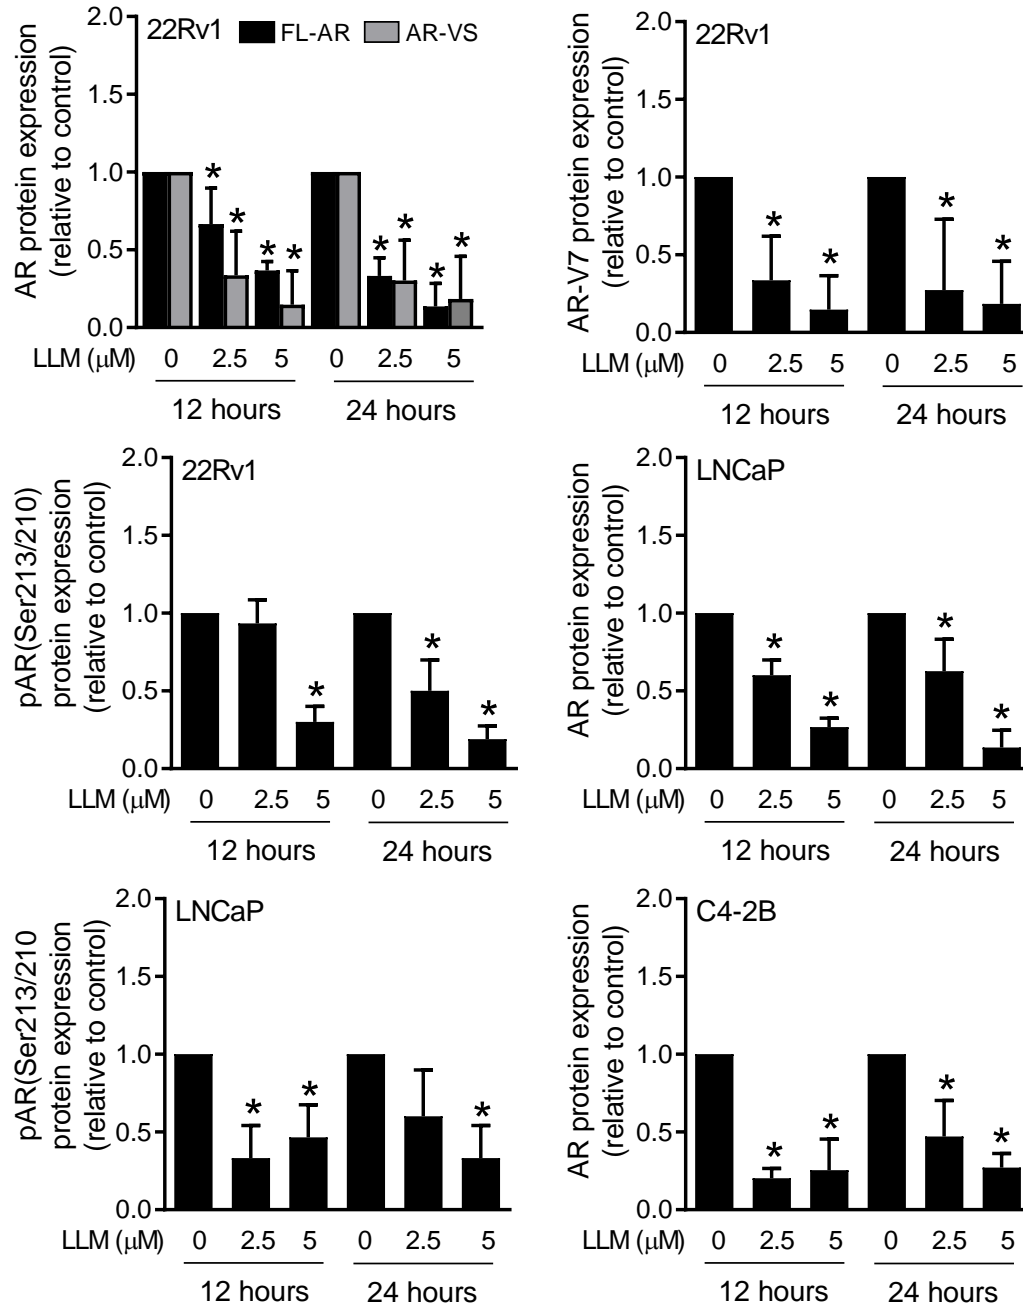

**Supplementary Figure S4.** LLM treatment inhibited R1881-stimulated nuclear translocation of AR in LNCaP cells. Immunocytochemistry for AR (100× objective magnification) in LNCaP cells pre-treated with ethanol or LLM for 3 hours and then incubated with ethanol or R1881 (1 nmol/L) for an additional 9 hours. The experiment was repeated twice with comparable results.

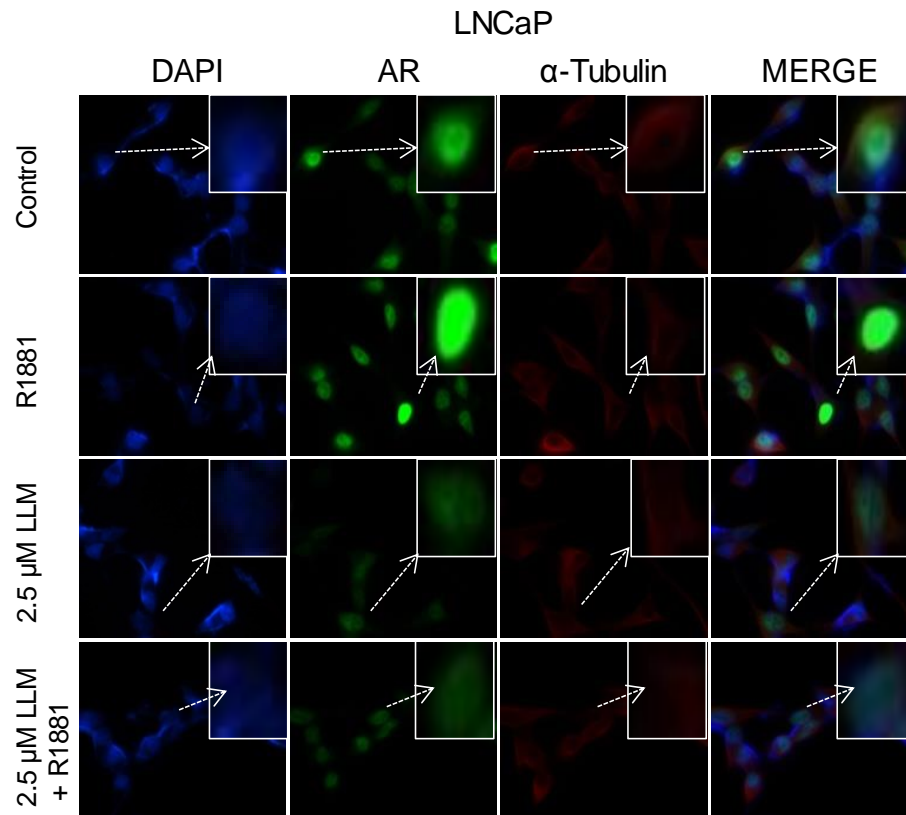

**Supplementary Figure S5.** LLM treatment downregulated PSA protein expression in prostate cancer cells. Densitometric quantitation of PSA protein expression in 22Rv1, LNCaP, and C4-2B cells (for data shown in Fig. 2E of the main text). Results shown are mean  $\pm$  SD (n = 3 independent experiments). \*Significantly different ( $p < 0.05$ ) compared with control by one-way ANOVA followed by Dunnett's test.

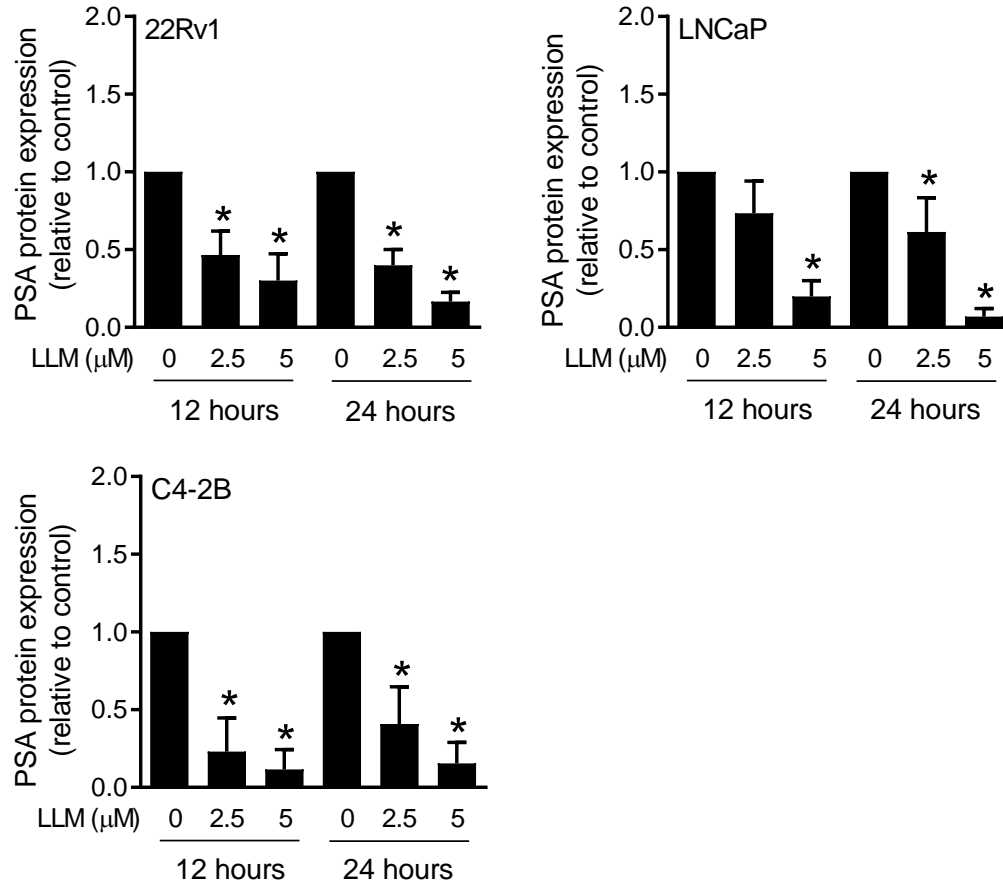

**Supplementary Figure S6.** Effect of MG132 on LLM-mediated downregulation of AR protein expression. **(A)** Densitometric quantitation of AR protein expression in 22Rv1 and LNCaP cells (for data shown in Fig. 3B of the main text) after treatment with MG132 (1-hour pre-treatment) and/or LLM (12-hour treatment). Results shown are mean of two independent experiments. The error bars are shown to indicate range of values. **(B)** Densitometric quantitation of AR protein expression in PC3-AR cells (for data shown in Fig. 3F of the main text). Results shown are mean  $\pm$  SD (n = 3 independent experiments). \*Significantly different ( $p < 0.05$ ) compared with control by one-way ANOVA followed by Dunnett's test.

**A**

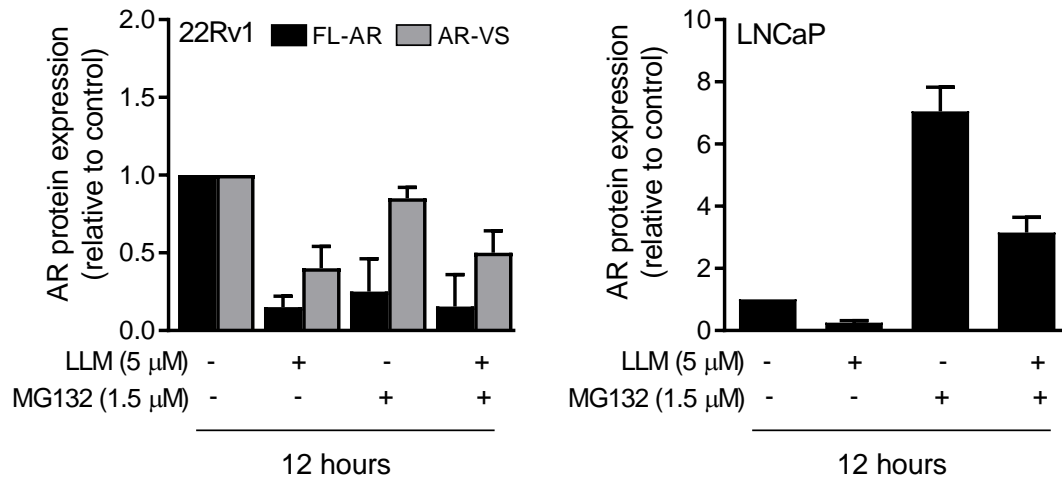

**B**

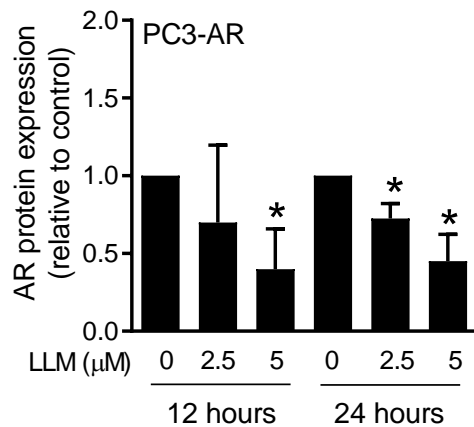

### Supplementary Figure S7. Effect of LLM-ITC on AR and PSA protein expression.

Densitometric quantitation of AR and PSA protein expression (for data shown in Fig. 5C of the main text) in 22Rv1, LNCaP, and PC3-AR cells after treatment with LLM-ITC. Results shown are mean  $\pm$  SD (n = 3 independent experiments). Statistical significance was determined by one-way ANOVA followed by Dunnett's test. AR or PSA expression was not significantly affected by LLM-ITC treatment in any cell line.

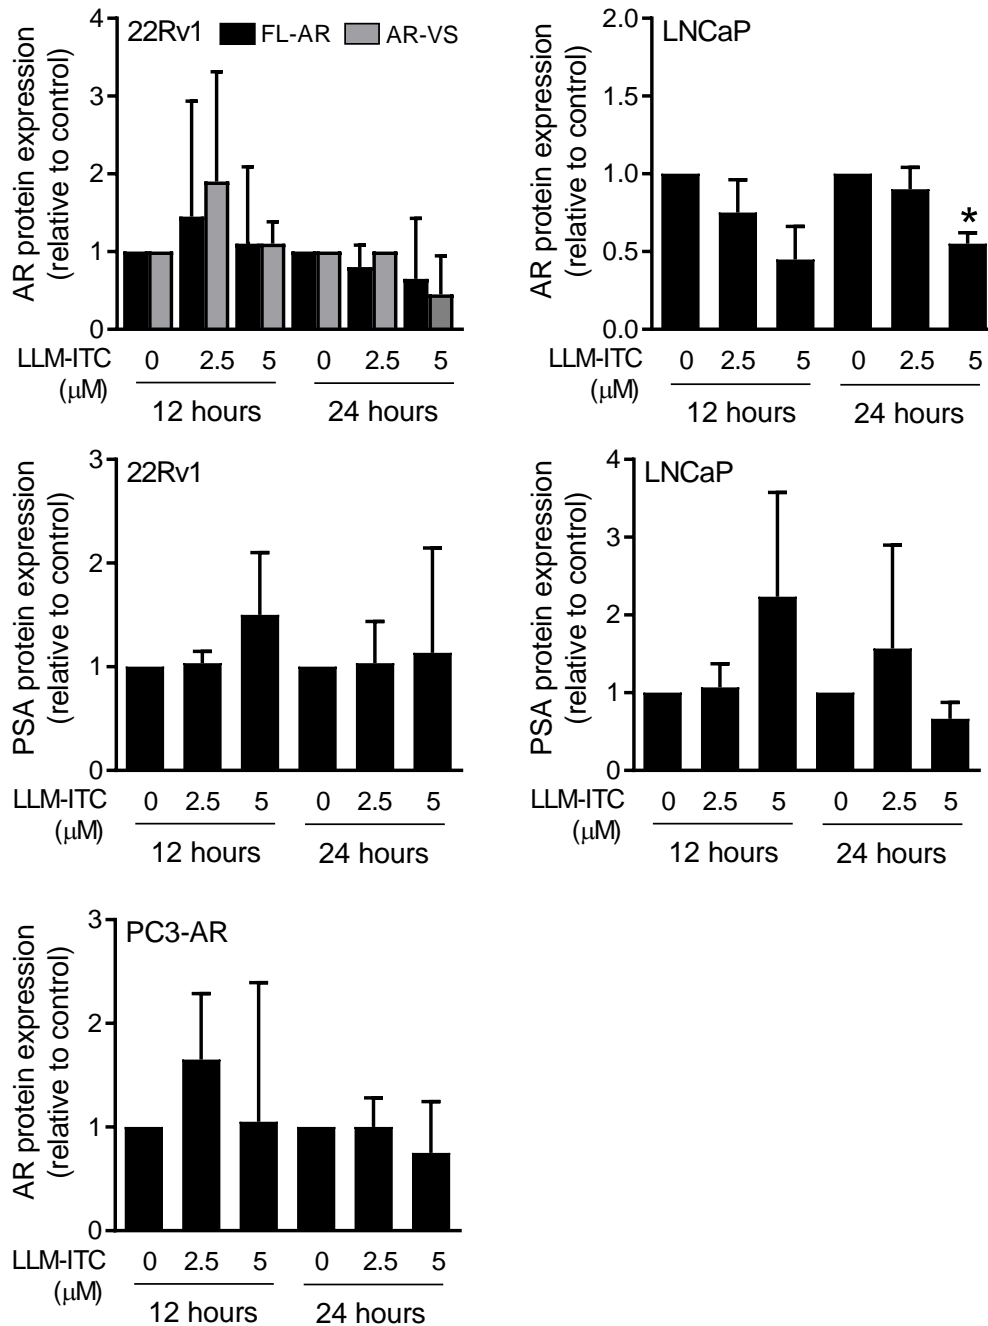

**Supplementary Figure S8.** Effect of LLM treatment on body weights of mice. The results shown are mean  $\pm$  SD (n = 5-6).

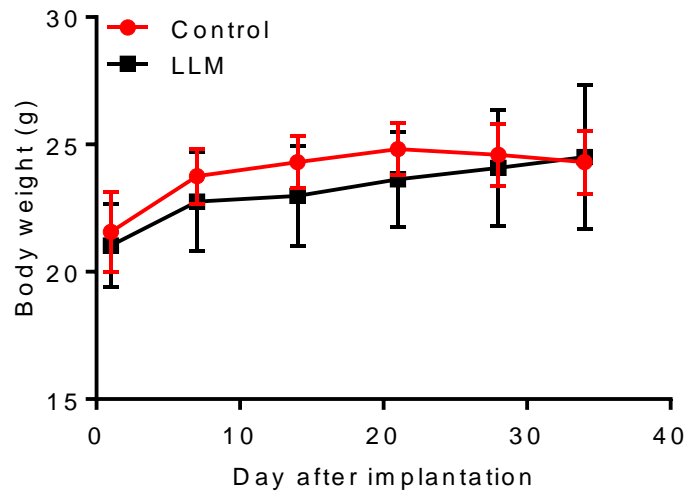

Supplement: NIHMS985883-supplement-supplementary_Figures.pdf [file NIHMS985883-supplement-supplementary_Figures.pdf]
